# Supplementary material
Source: Research Square preprint supplement (doi:10.21203/rs.3.rs-9441135/v1)
Supplement: Supplementary file 1 [file 2279b64152a8ffdae343ac14.docx]

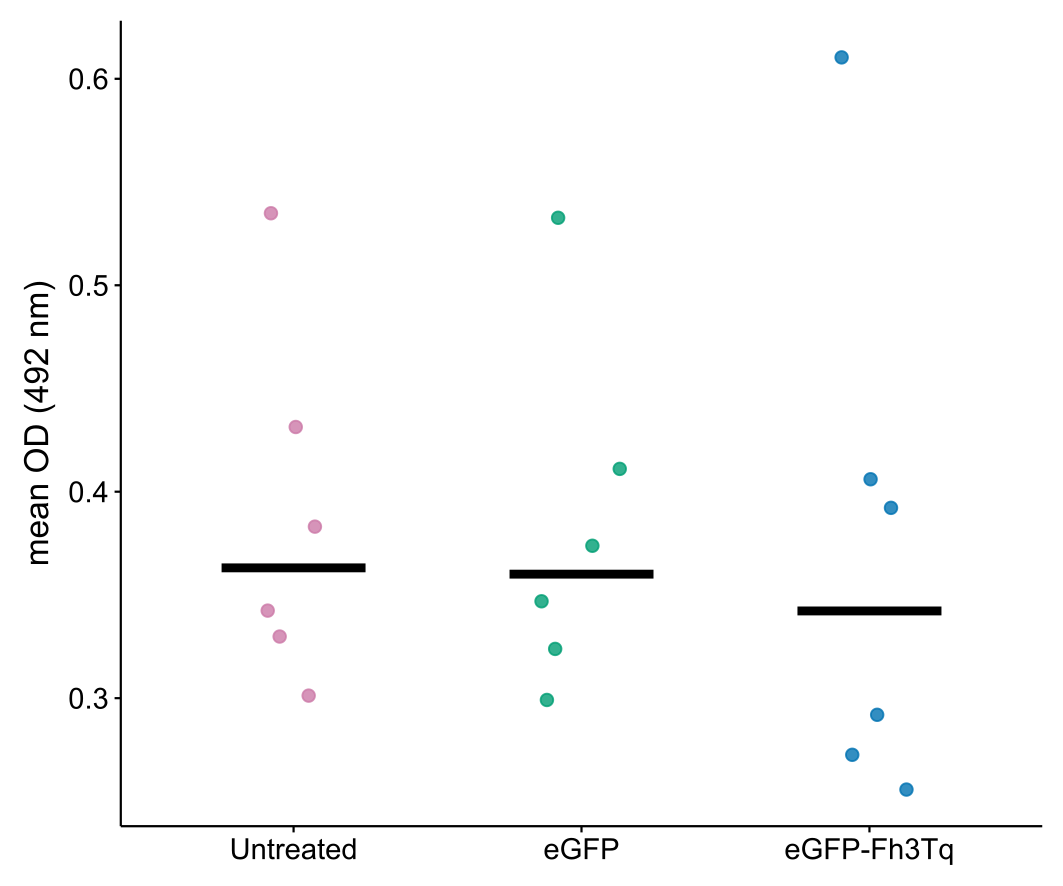


**Supplementary Figure 1. Anti-peptide antibody response**

T14-T15-T16 coated plates were probed by ELISA with D42 post-vaccination serum for IgG. Individual OD values are shown with group means (black bars). Groups: Untreated (PBS), eGFP (SLN-eGFP mRNA), and eGFP-Fh3Tq (SLN-eGFP-Fh3Tq mRNA).


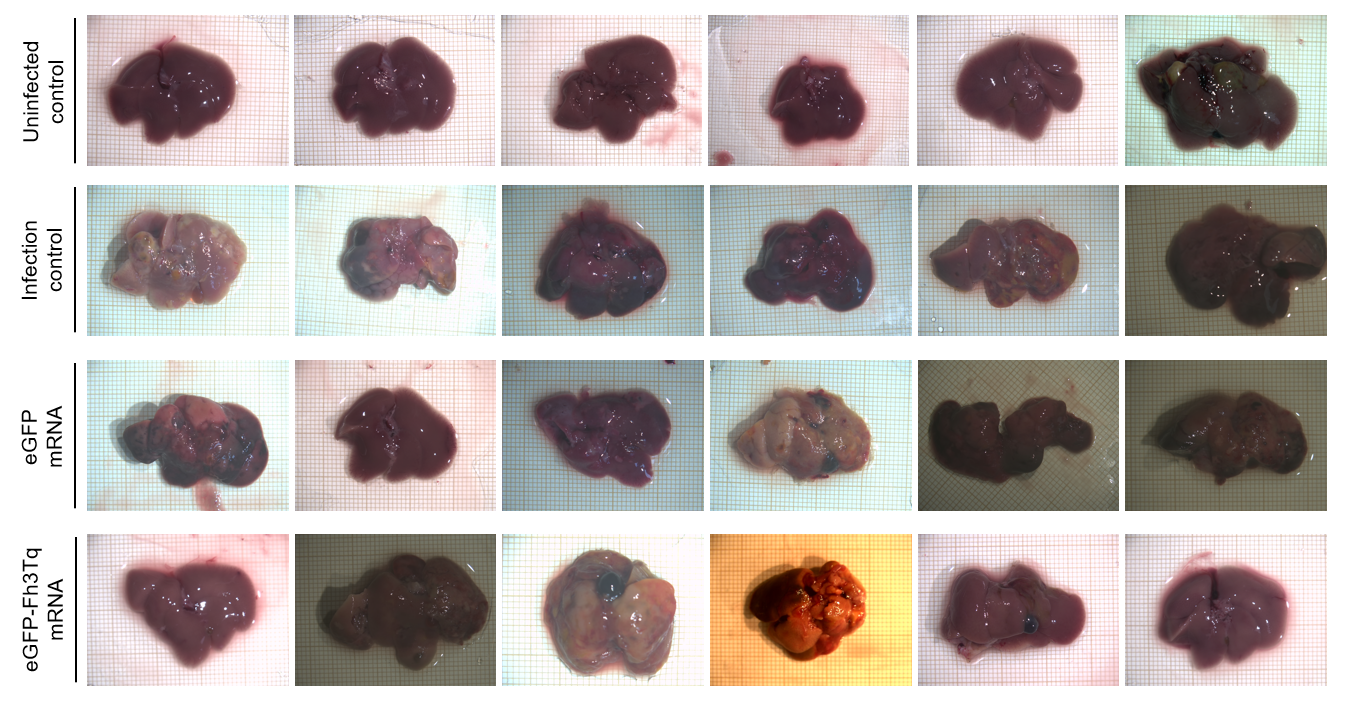


**Supplementary Figure 2. Photographs of livers from each mouse at necropsy after *F. hepatica* challenge.** Groups: Uninfected control (PBS, unchallenged), Infection control (PBS, challenged), eGFP (SLN-eGFP mRNA), and eGFP-Fh3Tq (SLN-eGFP-Fh3Tq mRNA).

**Supplementary Table 1**. Antibodies and reagents employed in spectral flow cytometry.

| **Antibody/Reagent** | **Clone** | **Source** | **Identifier** | **Panel** |
| --- | --- | --- | --- | --- |
| CD3 PE Fire700 | 17A2 | BioLegend | Cat# 100271,  RRID: AB_2876394 | 1, 2 |
| CD4 BV605 | GK1.5 | BD Biosciences | Cat# 743156,  RRID: AB_2741309 | 1, 2, 3 |
| CD5 BV750 | 53-7.3 | BD Biosciences | Cat# 747114,  RRID: AB_2871865 | 2 |
| CD8a BUV395 | 53-6.7 | BD Biosciences | Cat# 563786,  RRID: AB_2732919 | 1, 2, 3 |
| CD11b BV421 | M1/70 | BioLegend | Cat# 101236,  RRID: AB_11203704 | 1, 2 |
| CD11c BUV615 | N418 | BD Biosciences | Cat# 751222,  RRID: AB_2875243 | 1, 2 |
| CD19 RB545 | 1D3 | BD Biosciences | Cat# 569727,  RRID: AB_3668953 | 1, 2 |
| CD21/CD35 APC | 7E9 | BioLegend | Cat# 123412,  RRID: AB_2085160 | 2 |
| CD23 BUV737 | B3B4 | BD Biosciences | Cat# 749668,  RRID: AB_2873931 | 2 |
| CD25 BV480 | PC61 | BD Biosciences | Cat# 566120,  RRID: AB_2739522 | 2 |
| CD27 BB700 | LG.3A10 | BD Biosciences | Cat# 742135,  RRID: AB_2871394 | 2 |
| CD43 BV510 | S7 | BD Biosciences | Cat# 563206,  RRID: AB_2738069 | 1, 2 |
| CD44 APC Vio770 | REA664 | Miltenyi Biotec | Cat# 130-118-695,  RRID: AB_2733120 | 2, 3 |
| CD45 BUV496 | 30F11 | BD Biosciences | Cat# 569673,  RRID: AB_3675211 | 1, 2, 3 |
| CD45 APC | I3/2.3 | BioLegend | Cat# 147708,  RRID: AB_2563540 | 1, 2, 3 |
| CD45.2 PerCP | 104 | BioLegend | Cat# 109826,  RRID: AB_893349 | 1, 2, 3 |
| CD45R (B220) VioBlue | RA3-6B2 | Miltenyi Biotec | Cat# 130-118-321,  RRID: AB_2733945 | 1, 2, 3 |
| CD62L BUV805 | MEL-14 | BD Biosciences | Cat# 569201,  RRID: AB_3668954 | 2, 3 |
| CD69 BUV661 | H1.2F3 | BD Biosciences | Cat# 741478,  RRID: AB_2870943 | 2 |
| CD93 RY586 | AA4.1 | BD Biosciences | Cat# 753131,  RRID: AB_3668955 | 2 |
| CD103 PE Fire640 | QA17A24 | BioLegend | Cat# 156917,  RRID: AB_2924487 | 1, 2 |
| CD127 RB780 | A7R34 | BD Biosciences | Cat# 569066,  RRID: AB_3668957 | 2 |
| CD138 PE Cy5 | 281-2 | BD Biosciences | Cat# 142539,  RRID: AB_2894661 | 2 |
| CD304 BUV563 | V46-1954 | BD Biosciences | Cat# 752460,  RRID: AB_2917455 | 2 |
| CD335 (NKp46) BV711 | 29A1.4 | BioLegend | Cat# 137621,  RRID: AB_2563289 | 1, 2, 3 |
| I-A/I-E (MHC-II) BV650 | M5/114.15.2 | BD Biosciences | Cat# 563415,  RRID: AB_2738192 | 1, 2 |
| IgD BV605 | 11-26c.2a | BD Biosciences | Cat# 563003,  RRID: AB_2737944 | 2 |
| IgM BUV395 | R6-60.2 | BD Biosciences | Cat# 564025,  RRID: AB_2738550 | 2 |
| Ly6C PE Fire810 | HK1.4 | BioLegend | Cat# 128061,  RRID: AB_3083119 | 1, 2 |
| Ly6G R718 | 1A8 | BD Biosciences | Cat# 567039,  RRID: AB_2916402 | 1, 2 |
| Siglec-F AF647 | E50-2440 | BD Biosciences | Cat# 562680,  RRID: AB_2687570 | 1, 2 |
| TCRβ RB545 | H57-597 | BD Biosciences | Cat# 756204,  RRID: AB_3668961 | 2, 3 |
| ILA4 Vio515 | BVD4-1D11 | Miltenyi Biotec | Cat# 130-131-900,  RRID: AB_2660588 | 3 |
| IL17A BV786 | TC11-18H10 | BD Biosciences | Cat# 564171,  RRID: AB_2738642 | 3 |
| IL22 AF647 | MH22B2 | BD Biosciences | Cat# 56716,  RRID: AB_2916478 | 3 |
| IFN-γ PE Cy7 | XMG1.2 | BioLegend | Cat# 505826,  RRID: AB_2295770 | 3 |
| TruStain FcX™ PLUS | S17011E | BioLegend | Cat# 156604,  RRID: AB_2783138 | 1, 2, 3 |
| Brilliant Stain Buffer Plus | N/A | BD Biosciences | Cat# 566385 | 1, 2, 3 |
| True-Stain™ Monocyte Blocker | N/A | BioLegend | Cat# 426102 | 1, 2, 3 |
| BD FACS™ Lysing Solution 10X | N/A | BD Biosciences | Cat# 349202 | 1, 2 |
| FIX&PERM® Cell Fixation and Permeabilization Kit | N/A | Nordic-MUbio | Cat# GAS-002-1 | 3 |
| Zombie NIR™ Fixable Viability Kit | N/A | BioLegend | Cat# 423105 | 1, 2, 3 |

*Panel:* 1, Blood innate; 2, Blood adaptive; 3, ICS in spleen.

*Abbreviations:* AF, Alexa Fluor; APC, allophycocyanin; BB, Brilliant Blue; BUV, Brilliant Ultraviolet; BV, Brilliant Violet; Cat#, catalog number; CF, Cyanin-based Fluorescent dye; Cy5, Cyanin 5; Cy7, Cyanin 7; N/A, not applicable; NIR, near-infrared; PE, phycoerythrin; PerCP, peridinin-chlorophyll-protein; RB, RealBlue; RY, RealYellow; R, Red; RRID, Research Resource Identifier.

**Supplementary Table 2**. Single-stained reference controls employed for spectral unmixing.

| **Antibody** | **Type of particle** | **Positive reference population** |
| --- | --- | --- |
| CD3 PE Fire700 | Beads | Beads |
| CD4+ IgD BV605 | Cells (pre-wash) | Lymphocytes |
| CD5 BV750 | Beads | Beads |
| CD8a + IgM BUV395 | Cells (pre-wash) | Lymphocytes |
| CD11b BV421 | Beads | Beads |
| CD11c BUV615 | Cells | Monocytes |
| CD19 + TCRβ RB545 | Cells | Lymphocytes |
| CD21/CD35 APC | Cells | Lymphocytes |
| CD23 BUV737 | Cells | Lymphocytes |
| CD25 BV480 | Beads | Beads |
| CD27 BB700 | Cells | Lymphocytes |
| CD43 BV510 | Cells | Monocytes |
| CD44 APC Vio770 | Cells | Lymphocytes |
| CD45 BUV496 | Cells | Lymphocytes |
| CD45 APC | Cells | Lymphocytes |
| CD45.2 PerCP | Cells | Lymphocytes |
| CD45R (B220) VioBlue | Cells | Lymphocytes |
| CD62L BUV805 | Cells | Lymphocytes |
| CD64 PE | Beads | Beads |
| CD69 BUV661 | Beads | Beads |
| CD93 RY586 | Cells | Lymphocytes |
| CD95 RB744 | Beads | Beads |
| CD103 PE Fire640 | Cells | Lymphocytes |
| CD127 RB780 | Cells | Lymphocytes |
| CD138 PE Cy5 | Beads | Beads |
| CD185 PE CF594 | Beads | Beads |
| CD279 (PD1) APC Fire810 | Beads | Beads |
| CD304 BUV563 | Cells | Lymphocytes |
| CD335 (NKp46) BV711 | Beads | Beads |
| F4/80 SparkNIR685 | Beads | Beads |
| GL7 RB705 | Beads | Beads |
| I-A/I-E (MHC-II) BV650 | Cells | Lymphocytes |
| Ly6C PE Fire810 | Cells | Monocytes |
| Ly6G Ly6G | Cells | Neutrophils |
| NK1.1 BV570 | Beads | Beads |
| Siglec F AF647 | Beads | Beads |
| Zombie NIR | Cells* | Dead cells |
| IFNγ PE Cy7 | Beads | Beads |
| IL4 Vio B515 | Beads | Beads |
| IL17A BV786 | Beads | Beads |
| IL22 AF647 | Beads | Beads |

* Induce cell death prior to staining by incubating the cells at 60ºC for 10min prior to staining

Beads employed for spectral unmixing: UltraComp eBeadsTM (Thermo Fisher Scientific, cat. nr. 01-2222-42)

*Abbreviations:* AF, Alexa fluor; APC, allophycocyanin; BB; Brilliant Blue; BUV, Brilliant Ultraviolet; BV, Brilliant Violet; CF, Cyanin-based Fluorescent dye; Cy7, Cyanin7; N/A, not applicable; NIR, near-infrared; PE, Phycoerythrin; PerCP Cy5.5, Peridinin-chlorophyll-protein-cyanin 5.5; RB, RealBlue; RY, RealYellow; R, Red;

**Supplementary Table 3.** Immunophenotypic profiles employed for population identification in blood

| **Leukocyte population** | **Immunophenotype** |
| --- | --- |
| *Eosinophils* | SSChi, Siglec F+, CD11c-/lo, CD3-, CD19-, CD335-, F4/80-, Ly6G- |
| *Total neutrophils* | SSChi, Ly6Glo/+, CD11blo/+,CD3-, CD11c-, CD19-, CD335-, F4/80-, Siglec F- |
| *Immature neutrophils* | SSChi, Ly6Glo, CD11blo/+,CD3-, CD11c-, CD19-, CD335-, F4/80-, Siglec F- |
| *Mature neutrophils* | SSChi, Ly6G+, CD11b/+,CD3-, CD11c-, CD19-, CD335-, F4/80-, Siglec F- |
| *Monocytes* | CD43-/+, Ly6C-/+, I-A/I-E-/lo, CD3-, CD19-, CD335-, F4/80-, Ly6G-, Siglec F- |
| *Classical monocytes* | CD43-, Ly6C+, I-A/I-E-/lo, CD3-, CD19-, CD335-, F4/80-, Ly6G-, Siglec F- |
| *Intermediate monocytes* | CD43+, Ly6C+, I-A/I-E-/lo, CD3-, CD19-, CD335-, F4/80-, Ly6G-, Siglec F- |
| *Non-classical monocytes* | CD43+, Ly6C-, I-A/I-E-/lo, CD3-, CD19-, CD335-, F4/80-, Ly6G-, Siglec F- |
| *Dendritic cells (DC)* | B220-/+, CD11b-/+ CD11c-/+, CD8a-/+, CD103-/+, I-A/I-E+/++, CD3-, CD19-, CD335-, F4/80-, Ly6G-, Siglec F- |
| *Plasmacytoid DC* | B220+, CD11b- CD11c-/+, CD8a-, CD103-, I-A/I-E+, CD3-, CD19-, CD335-, F4/80-, Ly6G-, Siglec F- |
| *Myeloid DC* | B220-, CD11b-/+ CD11c+, CD8a-/+, CD103-/+, I-A/I-E++, CD3-, CD19-, CD335-, F4/80-, Ly6G-, Siglec F- |
| *cDC2* | B220-, CD11b+ CD11c+, CD8a-, CD103-, I-A/I-E++, CD3-, CD19-, CD335-, F4/80-, Ly6G-, Siglec F- |
| *cDC1* | B220-, CD11b-/lo CD11c+, (CD8a and/or CD103)+, I-A/I-E++, CD3-, CD19-, CD335-, F4/80-, Ly6G-, Siglec F- |
| *Total lymphocytes* | SSClo/int, CD45hi (B220-/+ and/or CD3-/+ and/or CD19-/+ and/or CD335-/+) |
| *NK cells* | SSClo, CD45hi, CD335+, B220-, CD3-, CD19- |
| *Immature NK cells* | SSClo, CD45hi, CD335+, CD11blo, CD27+, B220-, CD3-, CD19- |
| *Mature NK cells* | SSClo, CD45hi, CD335+, CD11b+, CD27lo, B220-, CD3-, CD19- |
| *Mature resting NK cells* | SSClo, CD45hi, CD335+, CD11b+, CD27lo, Ly6C+, B220-, CD3-, CD19- |
| *Mature non-resting NK cells* | SSClo, CD45hi, CD335+, CD11b+, CD27lo, Ly6C-/lo, B220-, CD3-, CD19- |
| *T cells* | SSClo, CD45hi, CD3+, TCRβ-/+, CD19-, CD335- |
| *CD4+ CD8- T cells* | SSClo, CD45hi, CD3+, CD4+, CD8-, TCRβ+, CD19-, CD335- |
| *TFH* | SSClo, CD45hi, CD3+, CD4+, CD8-, CD185+, CD279+, TCRβ+, CD19-, CD335- |
| *Treg* | SSClo, CD45hi, CD3+, CD4+, CD8-, CD127lo, (CD25+ and/or CD304+), TCRβ+, CD19-, CD335- |
| *CD25+ Treg* | SSClo, CD45hi, CD3+, CD4+, CD8-, CD25+, CD127lo, CD304-/+, TCRβ+, CD19-, CD335- |
| *CD25- Treg* | SSClo, CD45hi, CD3+, CD4+, CD8-, CD25-, CD127lo, CD304+, TCRβ+, CD19-, CD335- |
| *CD4+ Th cells* | SSClo, CD45hi, CD3+, CD4+, CD8-, CD127+, TCRβ+, CD19-, CD335- |
| *CD4- CD8+ T cells* | SSClo, CD45hi, CD3+, CD4-, CD8+, TCRβ+, CD19-, CD335- |
| *CD4+ CD8+ T cells* | SSClo, CD45hi, CD3+, CD4+, CD8+, TCRβ+, CD19-, CD335- |
| *CD4- CD8-/lo TCRαβ+ T cells* | SSClo, CD45hi, CD3+, CD4-, CD8-/lo, TCRβ+, CD19-, CD335- |
| *CD4- CD8-/lo TCRγδ+ T cells* | SSClo, CD45hi, CD3+, CD4-, CD8-/lo, TCRβ-, CD19-, CD335- |
| *B cells* | SSClo/int, CD45hi, B220-/+,CD19+, CD3-, CD335- |
| *B1 B cells* | SSClo, CD45hi, B220-/lo,CD19+, CD3-, CD335- |
| *B1a B cells* | SSClo, CD45hi, B220-/lo,CD5+,CD19+, CD3-, CD335- |
| *B1b B cells* | SSClo, CD45hi, B220+,CD5-,CD19+, CD3-, CD335- |
| *B2 B cells* | SSClo, CD45hi, B220+,CD19+, CD3-, CD335- |
| *Immature B2 cells* | SSClo, CD45hi, B220+,CD19+, CD93+, CD3-, CD335- |
| *Mature MZ B2 cells* | SSClo, CD45hi, B220+,CD19+, CD21/CD35hi, CD23lo, CD43-, CD93-, IgDlo, IgMhi, CD3-, CD335- |
| *Mature Follicular B2 cells* | SSClo, CD45hi, B220+,CD19+, CD21/CD35lo, CD23hi, CD43+, CD93-, IgDhi, IgMlo, CD3-, CD335- |

***Abbreviations:*** *cDC, Conventional dendritic cells; hi, high; int, intermediate; GC, germinal center; lo, low; MZ, marginal zone; SSC, side scatter; TFH, T follicular helper cells; Th, T helper; Treg, regulatory T cells.*
